# Supplementary material
Source: Frontiers journal article supplement (https://www.frontiersin.org/articles/216070)
Supplement: Data_Sheet_1.DOCX [file Data_Sheet_1.DOCX]

Supplementary Material

Virtual Reality Training for Public Speaking – A QUEST-VR Framework Validation

Sandra Poeschl

**Correspondence:** Sandra Poeschl: sandra.poeschl@tu-ilmenau.de

# Supplementary Material

The material handed out to participants for the low difficulty task and the high difficulty task are presented verbatim in the following.

## Material handed out for task 1 (low difficulty task)

1. Short Introduction

Ilmenau is a town in Thuringia, Germany. It is the largest town within the Ilm district with a population of 26,000, while the district capital is Arnstadt. Ilmenau is located approximately 33 km (21 miles) south of Erfurt and 135 km (84 miles) north of Nuremberg within the Ilm valley at the northern edge of the Thuringian Forest at an elevation of 500 metres (1,640 feet).

2. Schools and Institutions

Ilmenau has two secondary schools: The *Goethe-Gymnasium* and the *Gymnasium “Am Lindberg”*. While the *Goethe-Gymnasium* has its focus on mathematics and natural science, the other secondary school has its emphasis on media and communication technology.

The most important institution in Ilmenau is the Technische Universität Ilmenau, Thuringia's second-largest university with about 7,000 students and an emphasis on mathematics, physics, informatics, several engineering disciplines and media studies. Overall, the university offers 19 bachelor’s degree programmes and 23 master’s degree programmes.

Its precursor was founded in 1894 and developed into a university in 1992. Since 1990, many research institutes have been established in the area around the university making Ilmenau an important hub of technological research.

3. History

Ilmenau was historically a small mining town, primarily silver and copper, until the deposits were depleted. After 1800, it was Johann Wolfgang von Goethe's favorite resort because of its beautiful landscape. In 1838, the established spa led to the advent of tourism, which is still an important industry. Industrialisation started after the railway arrived in 1879, but increased rapidly during the following century primarily in glass and porcelaine manufacturing. The porcelaine factories closed (like everywhere in western Europe) during the 1990s. The glass industry, however, remains and produces laboratory equipment and measurement devices and is leading source of economic activity together with mechanical engineering and software engineering.

4. Tourism and Sights

The Kickelhahn is one of the most visited mountains within the Thuringian Forest and hosts and old viewing tower with a panorama above the town and the forest landscape.

Every year, one of the oldest festivals in the Thuringian Forest is celebrated at the top of the Kickelhahn. Alongside live music, meals and drinks the visitors can relax from the exhausting climb to the Kickelhahn mountain.

The Ilm river has two considerable tributaries within the towns area: the *Gabelbach* is a small creek with a little valley between Kickelhahn and Lindenberg south of the city. It is one of the most preferred areas for walks next to Ilmenau. The other one is the Schorte, a bigger creek within a deep, 10 km (6 miles) long valley in the south-east, marked by many abandoned mining tunnels, among whom one can be visited as a mining museum. The area north of Pörlitzer Höhe isn't part of the Ilm's drainage basin, the emanating rivers here (Reichenbach near Roda district and Wipfra near Oberpörlitz district) are tributaries of Gera river, which is itself a tributary of Unstrut river.

An inner-city water area is the *Ilmenauer Teichgebiet* between the old town and the main campus of the university with 5 lakes, laid out by monks during the Middle Ages for breeding fish. The biggest lake with an area of 95 hectares is made up of the Wipfra river next to Heyda district by the Heyda Dam, built in the 1980s.

5. Museums

There are some museums in Ilmenau:

- The *Goethe-Stadt-Museum* within the Amtshaus at Marktplatz is both the municipal and a museum about Johann Wolfgang von Goethe and his connection to the city.
- The *Jagdhaus Gabelbach* in the forest south of the city is a former hunting lodge, built in 1783 showing an exhibition about hunting and forestry during the 18th century.
- The *Fischerhütte* at Langewiesener Straße is a former glass factory and shows historic laboratory glassware, produced in Ilmenau as well as temporary exhibitions, for example about optics and light.

## Material handed out for task 2 (high difficulty task)

Please present your hometown in front of the audience (5 minute presentation). You can use the following headlines as structure points and for orientation. You are not allowed to take notes this time.

1. Short Introduction

2. Schools and Institutions

3. History

4. Tourism and Sights

5. Museums
